# Supplementary material
Source: publisher site journal article supplement (https://www.dovepress.com/article/supplementary_file/546371/546371%20Revised%20Supplementary%20Materials.docx)
Supplement: Supplementary file 1 [file 546371%20Revised%20Supplementary%20Materials.docx]

**Supplementary Figure and Table**

**Supplementary Figure 1** SNP selection and quality control process.


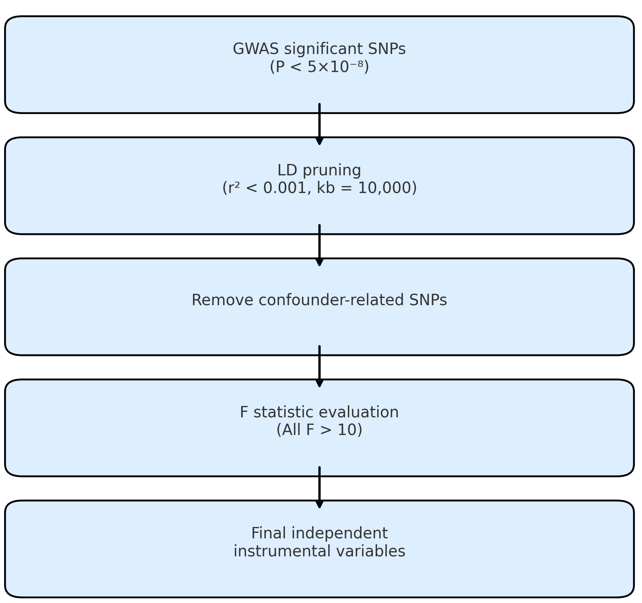


**Supplementary Figure 2** (A) Expression of relevant genes in the GEO dataset (GSE179285). (B) Correlation analysis between genes associated with IBD in the GEO dataset (GSE179285). (C) Expression of relevant genes in the GEO dataset (GSE70947). (D) Correlation analysis between genes associated with breast cancer in the GEO dataset (GSE70947). (E) Identification of intersecting genes with significant expression in IBD (GSE179285) and breast cancer (GSE70947); *P < 0.05, **P < 0.01, ***P < 0.001.


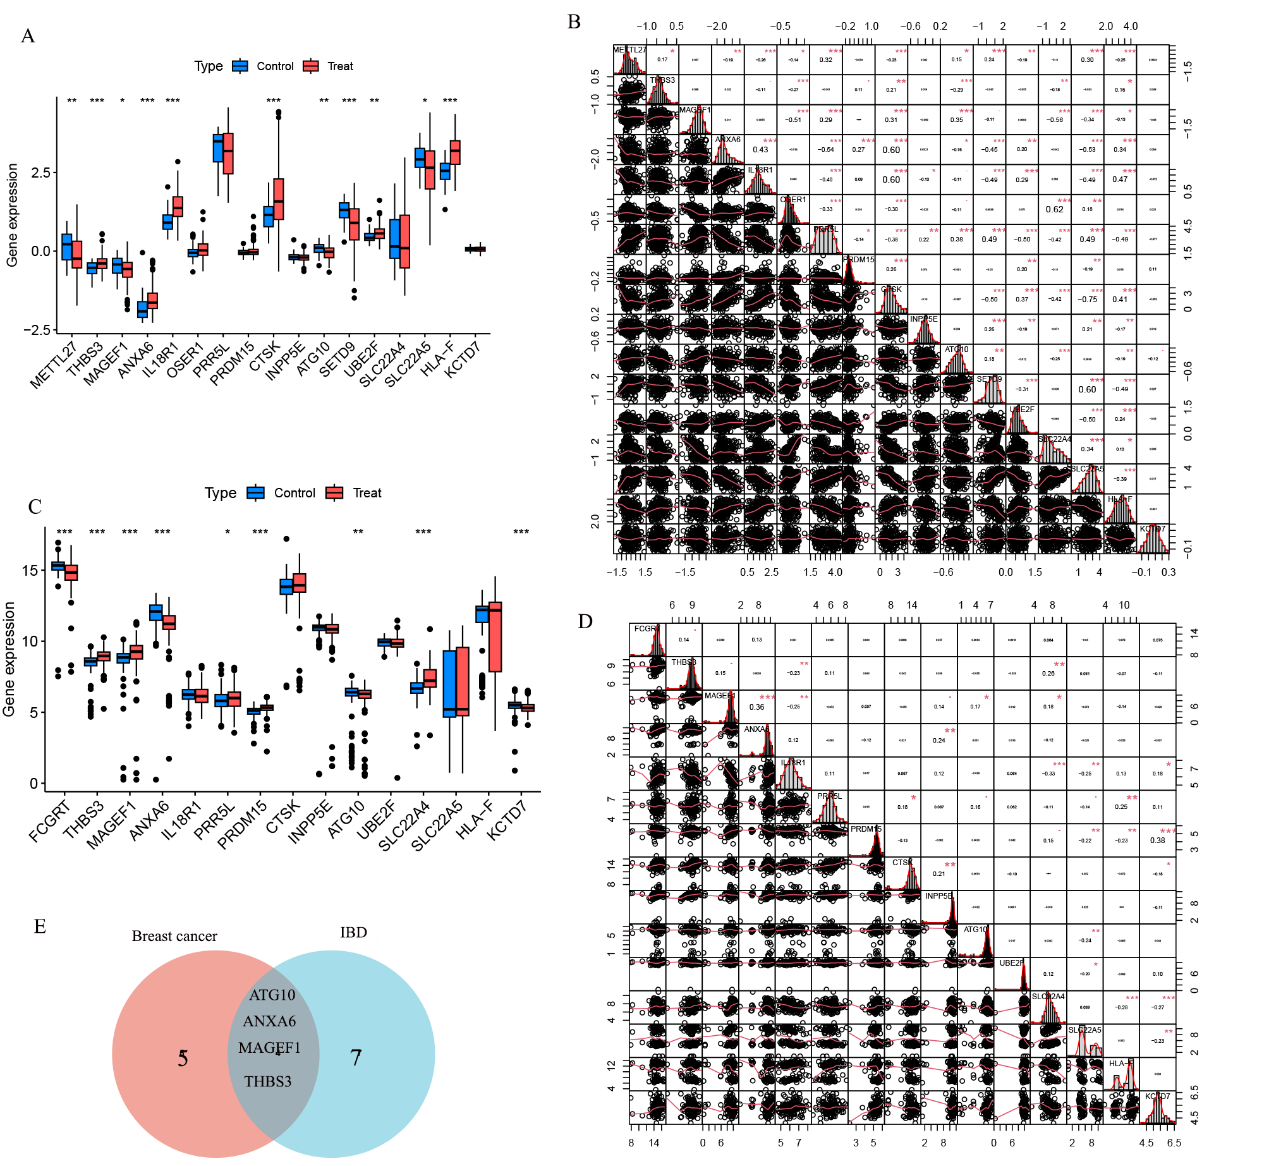


**Supplementary Figure 3** (A) Analyze the expression of THBS3 in normal intestinal tissues and inflammatory bowel disease tissues in the GEO database (GSE179285); (B) Analyze the expression of THBS3 in normal intestinal tissues and ulcerative colitis tissues in the GEO database (GSE179285); *P < 0.05, **P < 0.01.


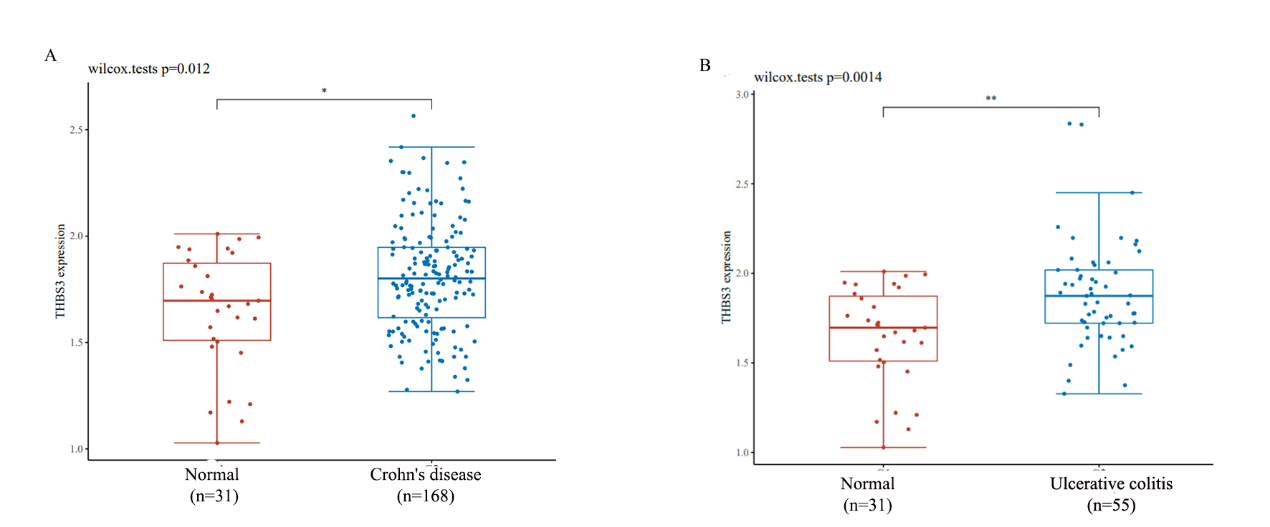


**Supplementary Figure 4** Analysis of immune cell expression and interactions in inflammatory bowel disease and normal intestinal tissue using the GSE179285 dataset. (A) Heatmap of 22 immune cells in the inflammatory bowel disease group and the control group. (B) Differences in immune cell composition between the inflammatory bowel disease group and the control group. (C) Correlation analysis among the 22 immune cell types; *P < 0.05, **P < 0.01, ***P < 0.001.


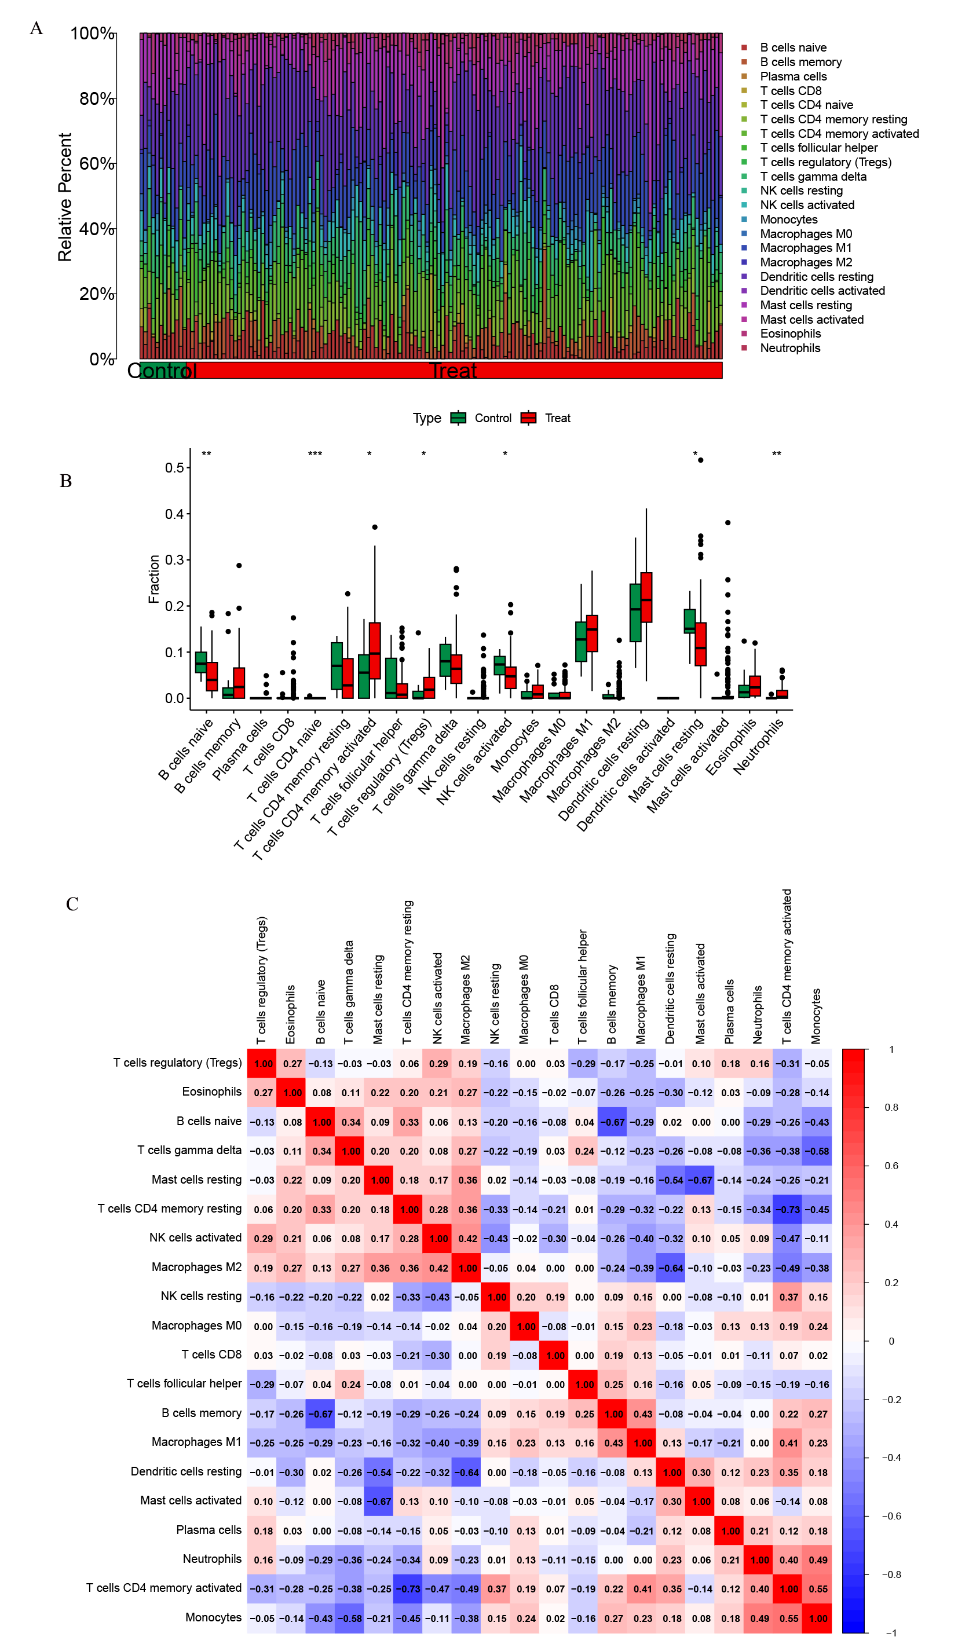


**Supplementary Figure 5** Analysis of immune cell expression and interactions in breast cancer and normal tissue using the GSE70947 dataset. (A) Heatmap of 22 immune cells in the breast cancer group and the control group. (B) Differences in immune cell composition between the breast cancer group and the control group. (C) Correlation analysis among the 22 immune cell types; **P < 0.01, ***P < 0.001.


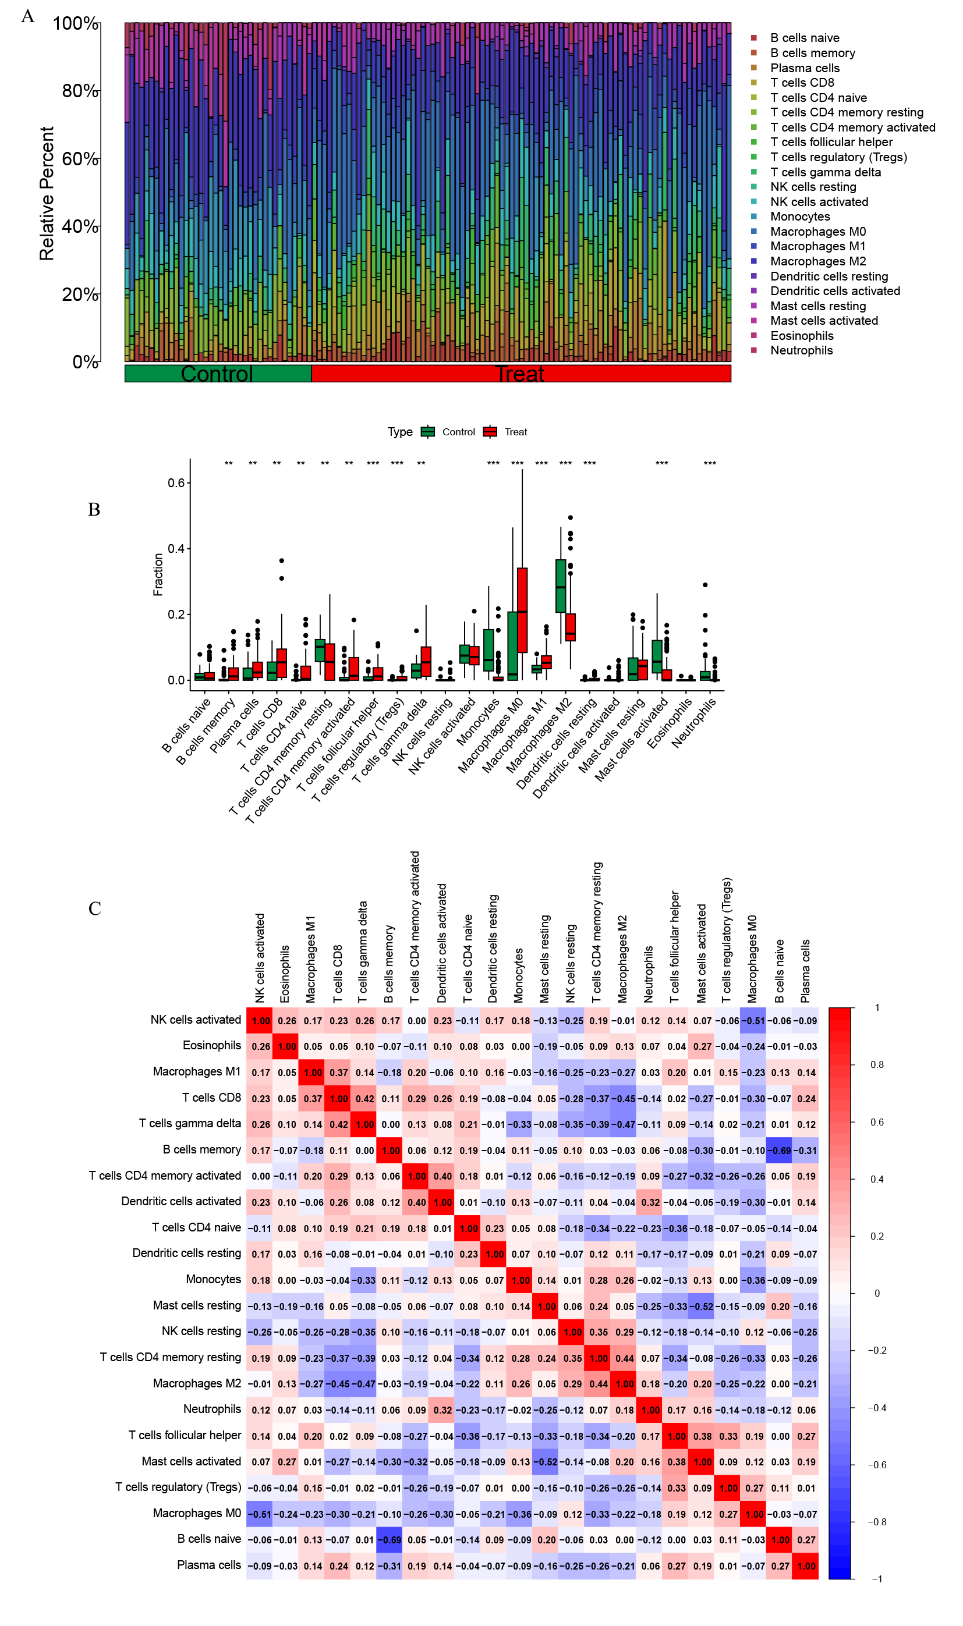


**Supplementary Figure 6** (A) Analysis of immune cell expression in the THBS3 high-expression and low-expression groups in the GSE179285 dataset. (B) Analysis of the correlation between THBS3 and immune cells in the GSE179285 dataset. (C) Analysis of immune cell expression in the THBS3 high-expression and low-expression groups in the GSE70947 dataset. (D) Analysis of the correlation between THBS3 and immune cells in the GSE70947 dataset; *P < 0.05, **P < 0.01, ***P < 0.001, ns P > 0.05.


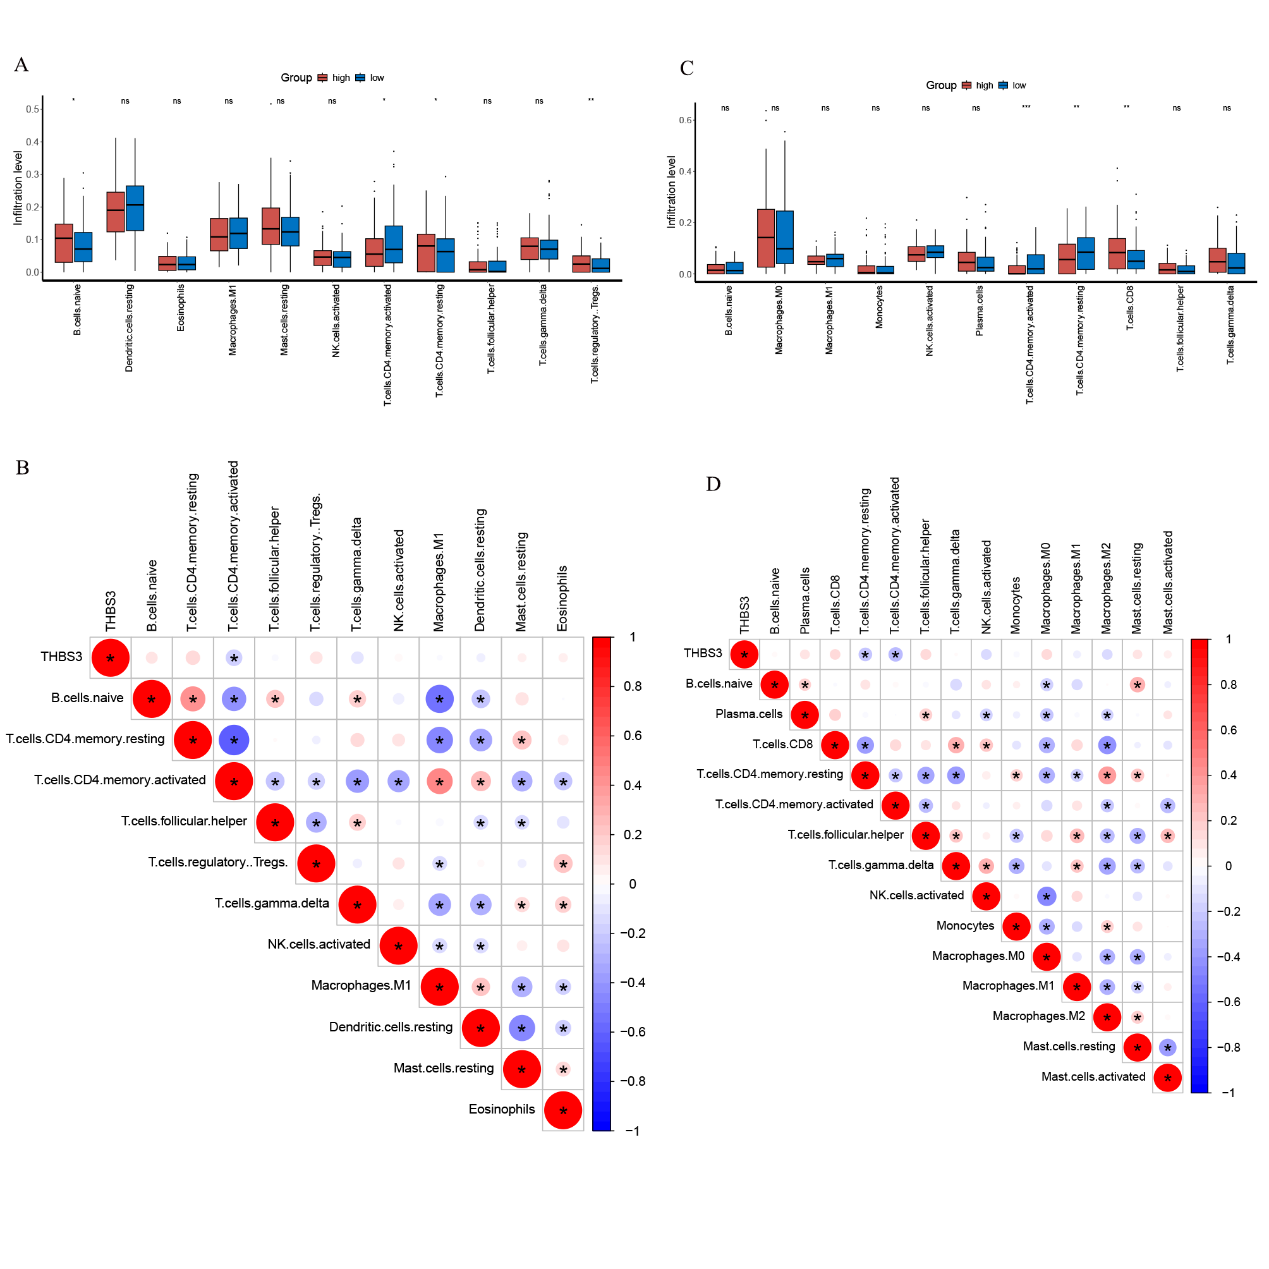


**Supplementary Material 1: Methods**

**Molecular Dynamics Simulation**

Molecular dynamics (MD) simulations were conducted using Gromacs (Version 2022.3): the Amber99sb-ildn force field and Tip3p water model were applied, while small molecules were optimized with the GAFF force field via AmberTools22 and assigned RESP charges calculated by Gaussian 16W. Sodium ions (Na⁺) were added to neutralize the system charge. Simulations were performed under 300 K and 1 bar conditions. Energy minimization was first achieved via the steepest descent algorithm, followed by NVT and NPT equilibration (100 ps each), and a final 100 ns production MD run (2 fs time step, totaling 5×10⁷ steps). Complex stability was analyzed through root mean square deviation (RMSD), root mean square fluctuation (RMSF), radius of gyration (Rg), solvent-accessible surface area (SASA), and hydrogen bond analysis. Binding energy and thermodynamic properties were evaluated using MM/GBSA and Gibbs free energy landscapes.

**Supplementary Material 2: Results**

**Stability Analysis of Small Molecule-Protein Receptor Complexes**

Molecular dynamics (MD) simulations (100 ns) were performed on THBS3 complexes with Rapamycin, Dinaciclib, and Daporinad to assess structural stability and interactions. Key metrics included RMSD, RMSF, Rg, SASA, hydrogen bonds, and binding free energy (Supplementary Figure 7A).

**RMSF Analysis**

Through molecular dynamics simulations, the RMSF analysis of THBS3 complexes with three small molecules (Daporinad, Dinaciclib, and Rapamycin) revealed that the three complexes exhibited similar overall fluctuation patterns, while displaying significant differences in regions adjacent to residues 50, 200, and 400. The THBS3-Daporinad complex (black curve) displayed the highest fluctuations (RMSF >2.0 nm), with Dinaciclib (red) maintaining elevated fluctuations at residues 200 and 400. In contrast, the Rapamycin-bound complex (blue) demonstrated the lowest overall fluctuations, indicating superior residue stability in its protein-ligand complex. These results highlight the differential regulatory effects of distinct ligands on the dynamic stability of the protein complexes (Supplementary Figure 7B).

**Radius of Gyration (Rg) Analysis**

Radius of gyration (Rg) analysis (Supplementary Figure 7C) revealed THBS3-Rapamycin achieved the lowest, fastest-converging Rg, indicating enhanced structural compactness, while THBS3-Daporinad and Dinaciclib showed higher final Rg values with incomplete structural compaction. These results demonstrate superior conformational stability in THBS3-Rapamycin and greater flexibility in Daporinad/Dinaciclib complexes.

**Hydrogen Bond Analysis**

To further investigate the conformational changes during small molecule binding to the protein receptor, we analyzed the hydrogen bonds formed within the THBS3 complexes with Daporinad, Dinaciclib, and Rapamycin (Supplementary Figure 7D). The THBS3-Rapamycin complex formed the highest number and most stable hydrogen bonds throughout the simulation, indicating the strongest interactions and highest structural stability within this system. In comparison, although the THBS3-Dinaciclib complex formed a relatively high number of hydrogen bonds, its increased fluctuation implies slightly lower stability than Rapamycin. The THBS3-Daporinad system formed the fewest hydrogen bonds, with frequent changes, suggesting a relatively unstable structure and weaker interactions between the protein and the small molecule.

**Solvent Accessible Surface Area (SASA) Analysis**

To investigate the effects of small molecule interactions on the solvent accessible surface area (SASA) of the protein receptor, SASA variations were analyzed as they reflect protein conformational changes and interactions with small molecules (Supplementary Figure 7E). The THBS3-Rapamycin complex exhibited the lowest and most stable SASA values throughout the simulation, indicating a more compact protein structure with minimal solvent-exposed surface area, which suggests higher structural stability. In contrast, the THBS3-Daporinad and THBS3-Dinaciclib complexes displayed higher SASA values, indicating a larger exposed surface area and a relatively looser structure.

**Gibbs Free Energy Analysis**

To further investigate the stability and interaction mechanisms of the THBS3 complexes with Daporinad, Dinaciclib, and Rapamycin, we utilized the "gmx_sham" function and "xpm2txt.py" script in Gromacs 2022.3. These tools allow precise calculation of Gibbs free energy based on the RMSD (Root Mean Square Deviation) and Rg (radius of gyration) values of the complexes. For a clearer representation of complex stability, we generated a three-dimensional free energy landscape plot, with the principal components PC1 and PC2 from PCA analysis of the RMSD and Rg values of each THBS3 complex with Daporinad, Dinaciclib, and Rapamycin on the x- and y-axes, and relative Gibbs free energy on the z-axis (Supplementary Figure 8).

The THBS3-Daporinad and THBS3-Rapamycin complexes exhibited a broader distribution of low-free-energy states, indicating a greater degree of conformational freedom and flexibility due to the interactions between the protein and small molecules, resulting in a wider range of structural variations. In contrast, the THBS3-Dinaciclib complex displayed a more concentrated low-free-energy region, suggesting lower conformational variability and higher structural stability. All three systems featured highly stable conformational states. However, the THBS3-Daporinad and THBS3-Rapamycin complexes showed relatively high energy barriers, with larger differences in free energy between conformational states, indicating that more energy may be required to achieve conformational transitions.

**MM/GBSA and Binding Free Energy Analysis**

In this study, to further understand the binding stability between small molecules and the target protein receptor molecules, the MM/GBSA method was used to calculate the binding free energy and the free energy contributions of amino acid residues. The free energy of a system is a critical thermodynamic quantity, commonly used in the study of phase transitions, critical phenomena, and more. Free energy calculations play a significant role in computational biology, being essential in applications such as drug design and protein structure prediction. Components include: ΔVDWAALS, ΔEelec, ΔEGB, ΔEsurf, ΔGgas, ΔGsolvation, and ΔTotal (Supplementary Table 5). Among the three complexes examined, the THBS3-Rapamycin complex exhibited the lowest total binding free energy (ΔTotal) at -48.36 ± 3.83 kJ/mol, indicating the strongest binding, primarily attributed to significant van der Waals interactions and lower solvation resistance. The binding free energies of THBS3-Dinaciclib and THBS3-Daporinad were slightly higher, at -41.22 ± 1.50 kJ/mol and -40.01 ± 1.12 kJ/mol, respectively, indicating relatively weaker binding. Notably, Dinaciclib exhibited stronger electrostatic interactions than Daporinad, while Daporinad demonstrated slightly lower solvation resistance. Overall, the THBS3-Rapamycin complex showed the most favorable binding strength and stability among the three systems.

**Supplementary Figure 7** (A) RMSD curves of the THBS3 complexes with Daporinad, Dinaciclib, and Rapamycin. (B) RMSF curves of the THBS3 complexes with Daporinad, Dinaciclib, and Rapamycin. (C) Rg curves of the THBS3 complexes with Daporinad, Dinaciclib, and Rapamycin. (D) Hydrogen bond number variation curves of the THBS3 complexes with Daporinad, Dinaciclib, and Rapamycin. (E) SASA curves of the THBS3 complexes with Daporinad, Dinaciclib, and Rapamycin.


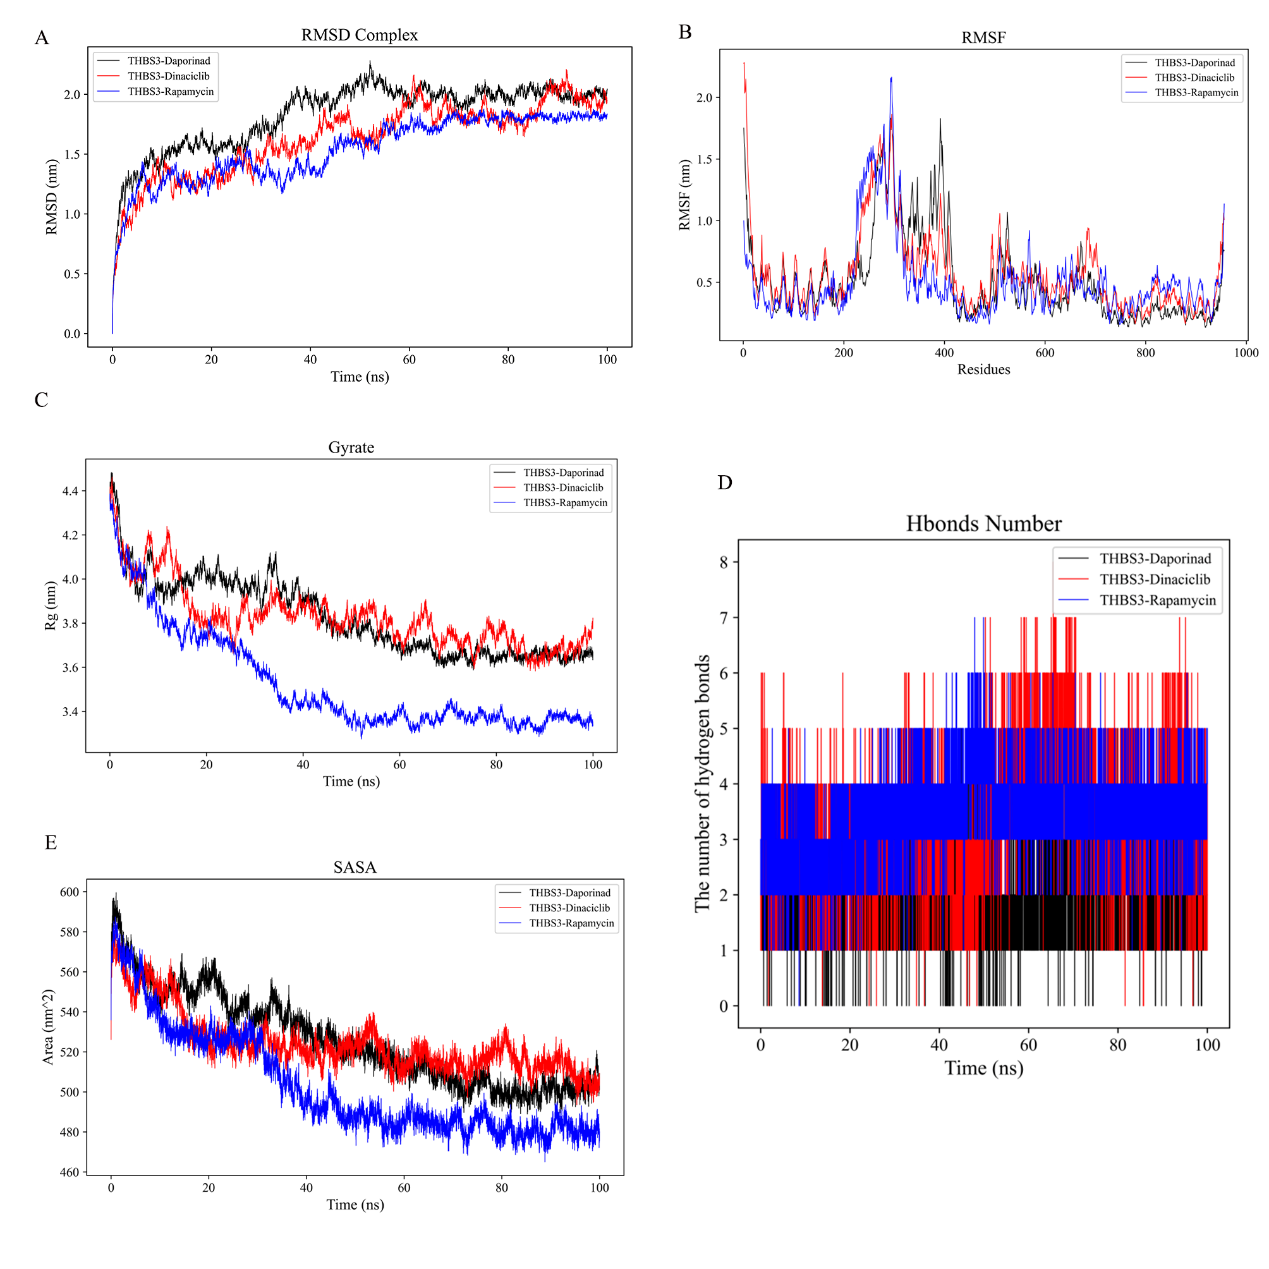


**Supplementary Figure 8** (A)-(B) 2D and 3D free energy landscape maps of the THBS3-Daporinad complex. (C)-(D) 2D and 3D free energy landscape maps of the THBS3-Dinaciclib complex. (E)-(F) 2D and 3D free energy landscape maps of the THBS3-Rapamycin complex.


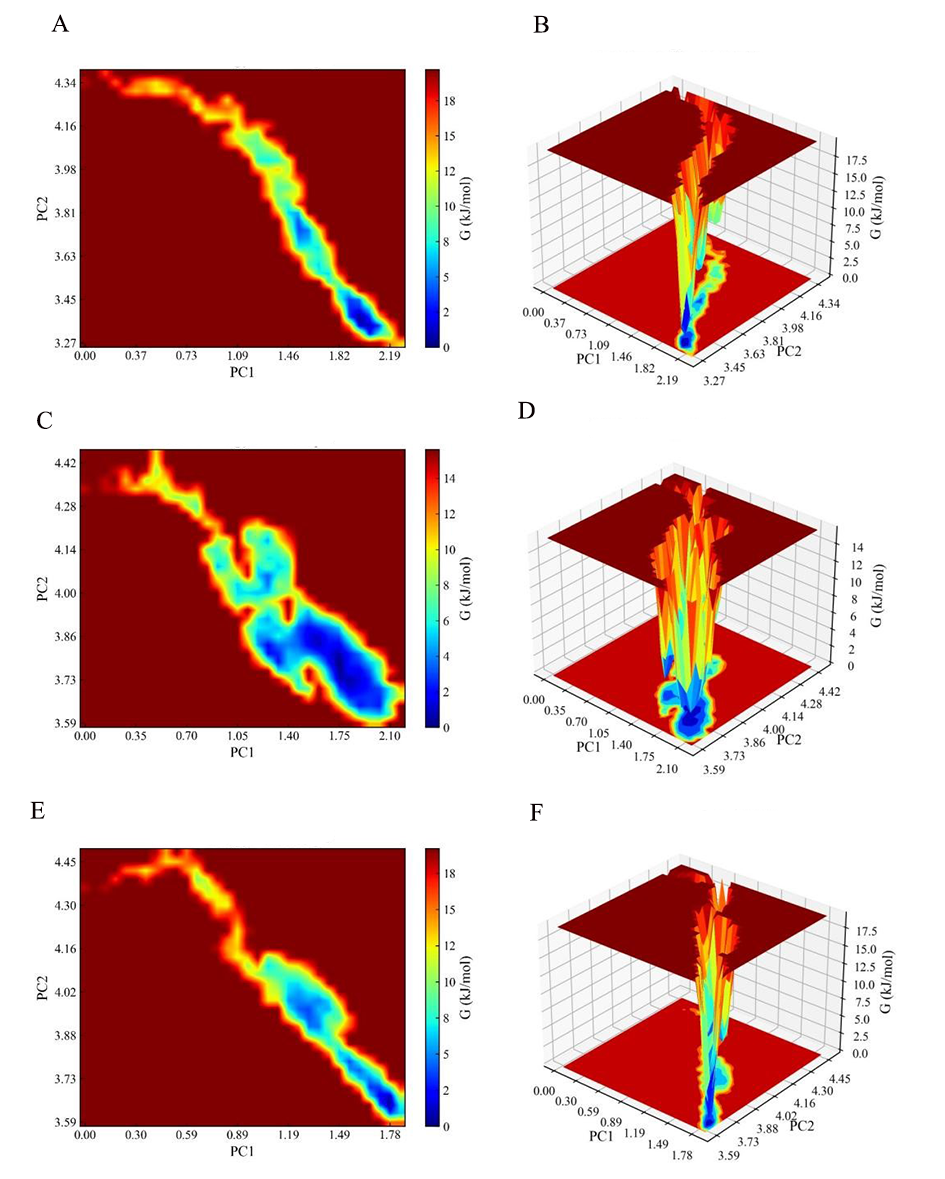


**Supplementary Table 1** MM/GBSA Results of THBS3 Complexed with Daporinad, Dinaciclib, and Rapamycin

| Energy | THBS3-Daporinad | THBS3-Dinaciclib | THBS3-Rapamycin |
| --- | --- | --- | --- |
| ΔVDWAALS | -53.57 ± 0.38 | -51.19 ± 1.34 | -67.12 ± 2.08 |
| ΔEelec | -29.14 ± 0.62 | -42.69 ± 0.57 | -27.06 ± 2.69 |
| ΔEGB | 49.74 ± 0.85 | 59.86 ± 0.37 | 54.55 ± 1.76 |
| ΔEsurf | -7.04 ± 0.11 | -7.21 ± 0.05 | -8.73 ± 0.10 |
| ΔGgas | -82.71 ± 0.72 | -93.87 ± 1.46 | -94.18 ± 3.40 |
| ΔGsolvation | 42.70 ± 0.86 | 52.66 ± 0.37 | 45.82 ± 1.76 |
| ΔTotal | -40.01 ± 1.12 | -41.22 ± 1.50 | -48.36 ± 3.83 |

**Supplementary Table 2** Predicted miRNAs targeting the THBS3

| *Gene* | *miRNA* | *miRanda* | *miRDB* | *TargetScan* | *Sum* |
| --- | --- | --- | --- | --- | --- |
| *THBS3* | hsa-miR-1182 | 1 | 1 | 1 | 3 |
| *THBS3* | hsa-miR-570-3p | 1 | 1 | 1 | 3 |
| *THBS3* | hsa-miR-185-3p | 1 | 1 | 1 | 3 |
| *THBS3* | hsa-miR-92a-2-5p | 1 | 1 | 1 | 3 |
| *THBS3* | hsa-miR-183-5p | 1 | 1 | 1 | 3 |
| *THBS3* | hsa-miR-519e-3p | 1 | 1 | 1 | 3 |
| *THBS3* | hsa-miR-33b-3p | 1 | 1 | 1 | 3 |
| *THBS3* | hsa-miR-515-3p | 1 | 1 | 1 | 3 |
| *THBS3* | hsa-miR-3170 | 1 | 1 | 1 | 3 |
| *THBS3* | hsa-miR-423-5p | 1 | 1 | 1 | 3 |

**Supplementary Table 3** Predicted lncRNA associated with miRNAs

| *miRNA* | *lncRNA* |
| --- | --- |
| hsa-miR-570-3p | RP11-10J21.4 |
| hsa-miR-423-5p | C10orf91 |
| hsa-miR-185-3p | HP09025 |
| hsa-miR-423-5p | PAX8-AS1 |
| hsa-miR-33b-3p | RP13-507P19.2 |
| hsa-miR-185-3p | RP11-102K13.5 |
| hsa-miR-423-5p | RP11-627G23.1 |
| hsa-miR-185-3p | RP11-394A14.2 |
| hsa-miR-185-3p | AP000345.1 |
| hsa-miR-423-5p | FLJ35934 |
| hsa-miR-423-5p | SRRM2-AS1 |
| hsa-miR-423-5p | RP11-14P20.1 |
| hsa-miR-185-3p | LINC01165 |
| hsa-miR-423-5p | RP11-186N15.3 |
| hsa-miR-1182 | LINC01128 |
| hsa-miR-423-5p | RP11-394A14.2 |
| hsa-miR-185-3p | SNHG14 |
| hsa-miR-185-3p | PABPC1L2B-AS1 |
| hsa-miR-423-5p | HP09025 |

**Supplementary Table 4** Construction of the ceRNA network

| *Node1* | *Node2* | *Interaction* |
| --- | --- | --- |
| *THBS3* | hsa-miR-1182 | mRNA |
| *THBS3* | hsa-miR-570-3p | mRNA |
| *THBS3* | hsa-miR-185-3p | mRNA |
| *THBS3* | hsa-miR-92a-2-5p | mRNA |
| *THBS3* | hsa-miR-33b-3p | mRNA |
| *THBS3* | hsa-miR-423-5p | mRNA |
| *RP11-10J21.4* | hsa-miR-570-3p | lncRNA |
| *C10orf91* | hsa-miR-423-5p | lncRNA |
| *HP09025* | hsa-miR-185-3p | lncRNA |
| *PAX8-AS1* | hsa-miR-423-5p | lncRNA |
| *RP13-507P19.2* | hsa-miR-33b-3p | lncRNA |
| *RP11-102K13.5* | hsa-miR-185-3p | lncRNA |
| *RP11-627G23.1* | hsa-miR-423-5p | lncRNA |
| *RP11-394A14.2* | hsa-miR-185-3p | lncRNA |
| *AP000345.1* | hsa-miR-185-3p | lncRNA |
| *FLJ35934* | hsa-miR-423-5p | lncRNA |
| *SRRM2-AS1* | hsa-miR-423-5p | lncRNA |
| *RP11-14P20.1* | hsa-miR-423-5p | lncRNA |
| *LINC01165* | hsa-miR-185-3p | lncRNA |
| *RP11-186N15.3* | hsa-miR-423-5p | lncRNA |
| *LINC01128* | hsa-miR-1182 | lncRNA |
| *RP11-394A14.2* | hsa-miR-423-5p | lncRNA |
| *SNHG14* | hsa-miR-185-3p | lncRNA |
| *PABPC1L2B-AS1* | hsa-miR-185-3p | lncRNA |
| *HP09025* | hsa-miR-423-5p | lncRNA |
| *CTD-2619J13.14* | hsa-miR-92a-2-5p | lncRNA |

**Supplementary Table 5** The GSEA analysis results of Breast cancer

| Description | Enrichment Score | NES | P value |
| --- | --- | --- | --- |
| KEGG_ECM_RECEPTOR_INTERACTION | 0.629121 | 2.502671 | 1.00E-10 |
| KEGG_HYPERTROPHIC_CARDIOMYOPATHY_HCM | 0.518853 | 2.064021 | 3.20E-06 |
| KEGG_FOCAL_ADHESION | 0.40053 | 1.787492 | 2.79E-06 |
| KEGG_DILATED_CARDIOMYOPATHY | 0.501783 | 2.006707 | 5.74E-06 |
| KEGG_ARRHYTHMOGENIC_RIGHT_VENTRICULAR_CARDIOMYOPATHY_ARVC | 0.514936 | 1.990313 | 1.63E-05 |
